# Supplementary material for: A controllable local drug delivery system based on porous fibers for synergistic treatment of melanoma and promoting wound healing
Source: Royal Society of Chemistry journal article supplement (doi:10.1039/c9bm01045a), 2019-01-01
Supplement: c9bm01045a1.pdf [file c9bm01045a1.pdf]

## Supporting Information

### **A Controllable Local Drug Delivery System Based on Porous Fibers for Synergistic Treatment of Melanoma and Promoting Wound Healing**

Zhipeng Yuan<sup>a</sup>, Kexin Zhang<sup>a</sup>, Xiangyu Jiao<sup>a</sup>, Yaru Cheng<sup>a</sup>, Yiyi Zhang<sup>a</sup>, Peixun Zhang<sup>b</sup>, Xueji Zhang<sup>a</sup>, Yongqiang Wen<sup>a,\*</sup>

*a. Research Center for Bioengineering & Sensing Technology, School of Chemistry and Biological Engineering, University of Science and Technology Beijing, Beijing 100083, China*

*b. Department of Orthopedics and Trauma, Peking University People's Hospital, Beijing 100083, China*

\* for corresponding author.

*E-mail address: [wyq\\_wen@ustb.edu.cn](mailto:wyq_wen@ustb.edu.cn)*

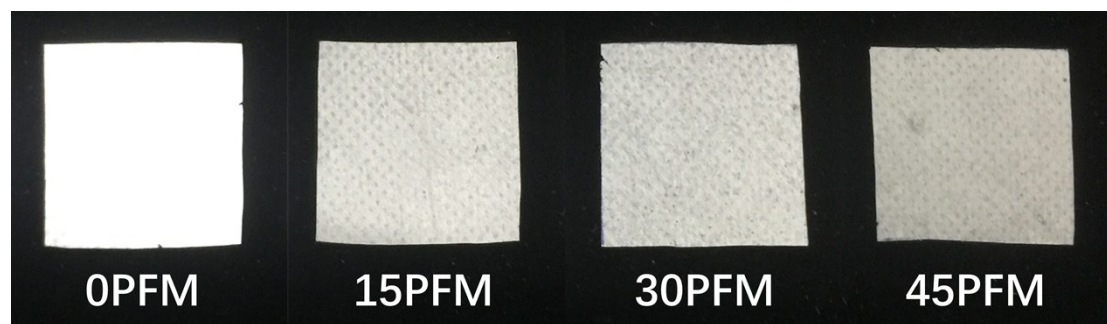

Fig. S1 Photographs of porous fiber membrane incorporated with different amounts of CuS nanoparticles.

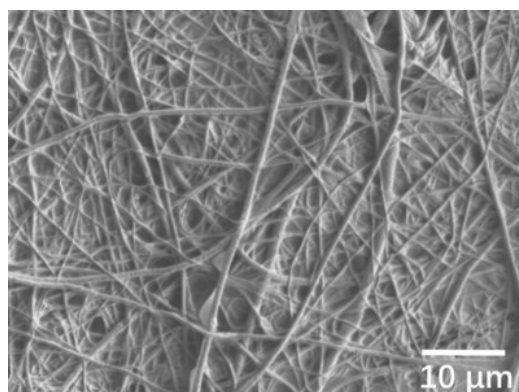

Fig. S2 The morphology of 30PFMP.

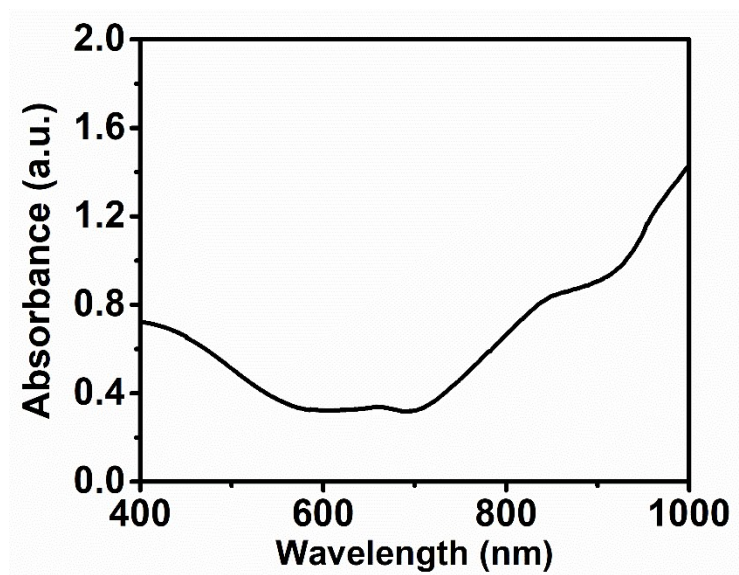

Fig. S3 Ultraviolet-visible absorption spectroscopy of CuS.

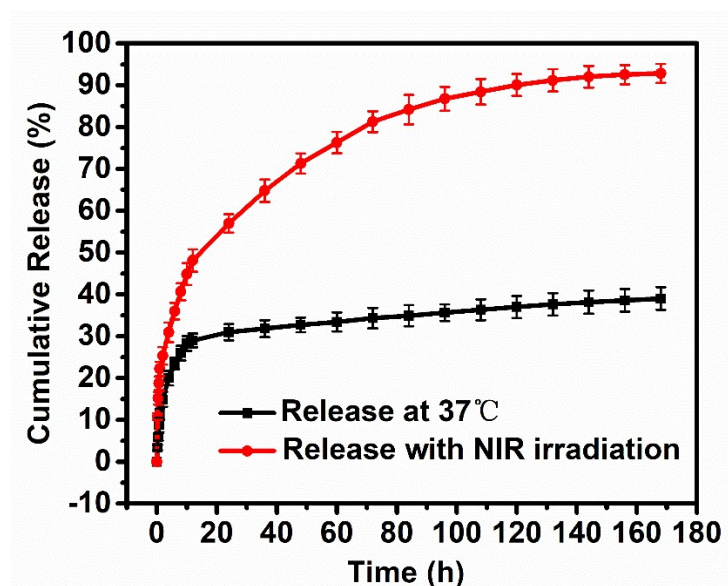

Fig. S4 Drug release profiles of 30PFMP at 37°C and under NIR laser irradiation.

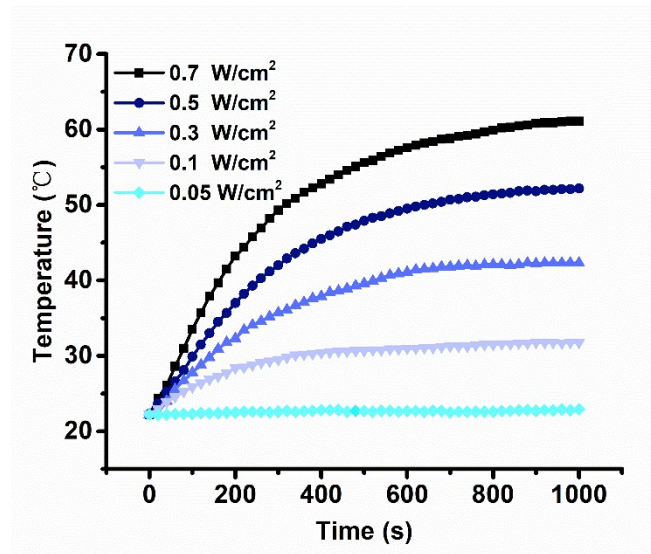

Fig. S5 The photothermal heating curves with different laser power densities after irradiation for 1000 s in the wet environment (1ml PBS).

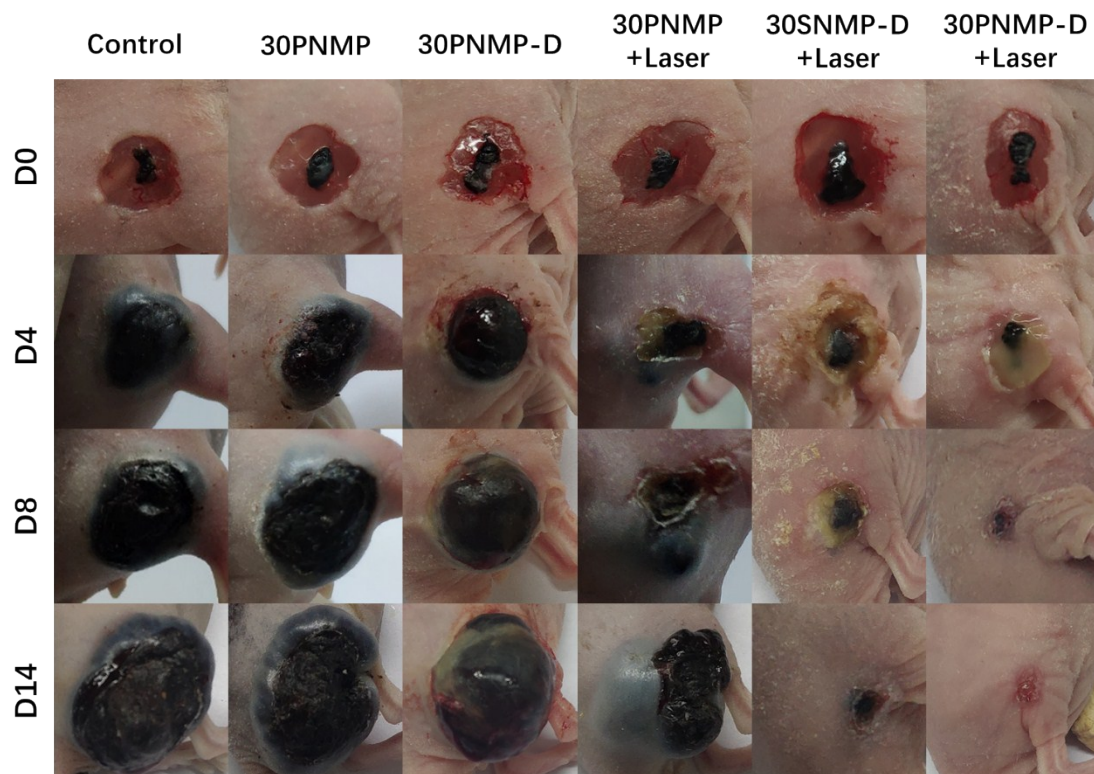

Fig. S6 Photographs of the tumor and surrounding skin on day 0, day 4, day 8 and day 14 after various treatment.

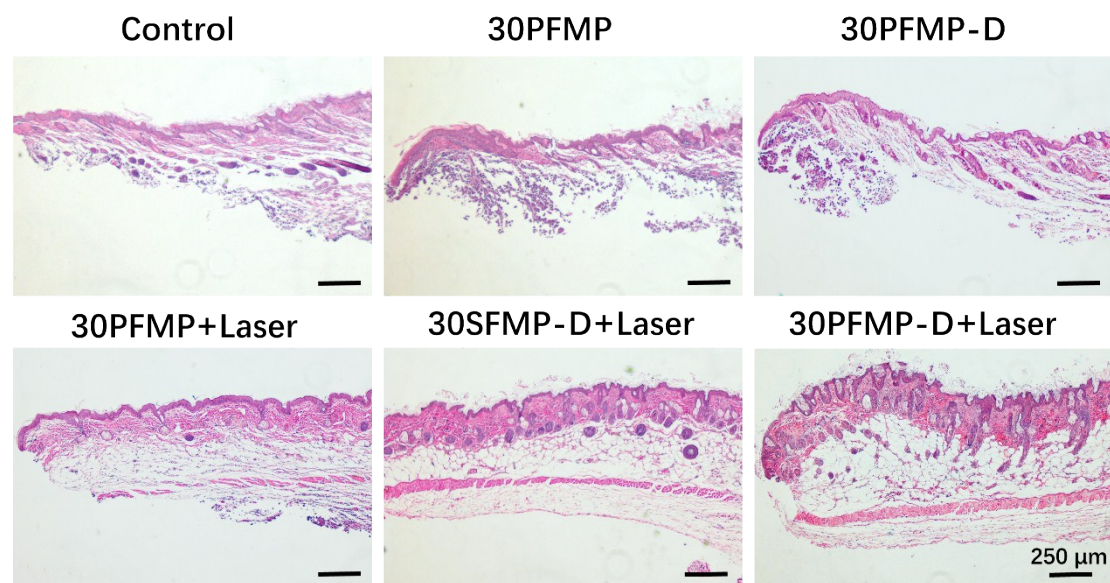

Fig. S7 H&E staining images of skin wounds at the tumor site on day 14 of control, 30PFMP, 30PFMP-D, 30PFMP+Laser, 30SFMP-D+Laser, 30PFMP-D+Laser groups.
